# Supplementary material
Source: PubMed Central journal article supplement (PMC6077696)
Supplement: pnas.1803916115.sapp.pdf [file pnas.1803916115.sapp.pdf]

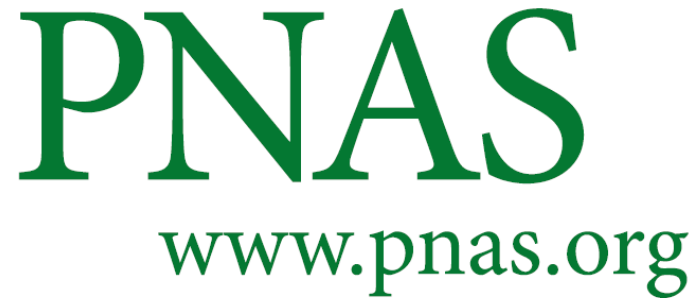

Supplementary Information for

**Neural Mechanisms underlying Pupil Mimicry in Trust Formation**

Eliska Prochazkova, Luisa Prochazkova, Michael R. Giffin, Steven H. Scholte, Carsten K.W. De Dreu, & Mariska E. Kret

Eliska Prochazkova  
Email: [e.prochazkova@fsw.leidenuniv.nl](mailto:e.prochazkova@fsw.leidenuniv.nl)

**This PDF file includes:**

Tables S1 to S12  
Figure S1

## Behavioral results

**Table S1. The effect of partner's pupil on participants' trust**

| <b>Fixed Factors*</b> | <b>F</b>        | <b>Df1</b> | <b>Df2</b> | <b>p-value</b> |
|-----------------------|-----------------|------------|------------|----------------|
| Corrected Model       | 38.00           | 2          | 5,933      | <b>0.000</b>   |
| Pupil Partner         | 38.00           | 2          | 5,213      | <b>0.000</b>   |
| <b>Random Factors</b> | <b>Estimate</b> | <b>SE</b>  | <b>Z</b>   | <b>p-value</b> |
| Variance              | 2.955           | 0.055      | 53.930     | <b>0.000</b>   |
| Var(intercept)        | 1.048           | 0.244      | 4.288      | <b>0.000</b>   |

**Table S2: The effect of partner's pupil on participants' pupil size**

| <b>Fixed Factors</b>        | <b>F</b>         | <b>Df1</b>     | <b>Df2</b>     | <b>p-value</b>                 |              |                    |        |
|-----------------------------|------------------|----------------|----------------|--------------------------------|--------------|--------------------|--------|
| Intercept                   | 14.201           | 11             | 153,986        | <b>0.000</b>                   |              |                    |        |
| Pupil Partner               | 1.274            | 2              | 153,986        | 0.280                          |              |                    |        |
| lin                         | 19.504           | 1              | 153,986        | <b>0.000</b>                   |              |                    |        |
| quadr                       | 82.079           | 1              | 153,986        | <b>0.000</b>                   |              |                    |        |
| cub                         | 15.234           | 1              | 153,986        | <b>0.000</b>                   |              |                    |        |
| Pupil Partner * lin         | 8.276            | 2              | 153,986        | <b>0.000</b>                   |              |                    |        |
| Pupil Partner * quadr       | 1.923            | 2              | 153,986        | 0.146                          |              |                    |        |
| Pupil Partner * cub         | 15.783           | 2              | 153,986        | <b>0.000</b>                   |              |                    |        |
|                             |                  |                | <b>p-value</b> | <b>95% Confidence Interval</b> |              |                    |        |
| <b>Random Factors</b>       | <b>Res. Eff.</b> | <b>Estimat</b> | <b>SE</b>      | <b>Z</b>                       | <b>Lower</b> | <b>Upper Bound</b> |        |
| Repeated Measures           | AR1<br>diagonal  | 0.255          | 0.004          | 64.219                         | 0.000        | 0.247              | 0.263  |
|                             | AR1 rho          | 0.986          | 0.000          | 4,316.792                      | 0.000        | 0.985              | 0.986  |
| Intercept [subject =<br>ID] | Variance         | 0.015          | 0.004          | 3.906                          | 0.000        | 0.009              | 0.0026 |

**Table S3: The effect of partner's pupil on participants' trust**

| <b>Fixed Factors</b>  | <b>F</b> | <b>Df1</b> | <b>Df2</b> | <b>p-value</b> |
|-----------------------|----------|------------|------------|----------------|
| Intercept             | 15.229   | 5          | 5,750      | <b>0.000</b>   |
| Pupil Partner         | 32.00    | 2          | 5,750      | <b>0.000</b>   |
| Mimicry (yes/no)      | 19,504   | 1          | 5,750      | 0.312          |
| Pupil Partner*Mimicry | 6        | 2          | 5,750      | <b>0.003</b>   |

|                          |           |         |       |        | <i>p</i> -value | 95% Confidence Interval |             |
|--------------------------|-----------|---------|-------|--------|-----------------|-------------------------|-------------|
| Random Factors           | Res. Eff. | Estimat | SE    | Z      |                 | Lower                   | Upper Bound |
| Intercept                | Variance  | 2.954   | 0.056 | 53.099 | 0.000           | 2.847                   | 3.066       |
| Intercept [subject = ID] | Variance  | 1.038   | 4.243 | 4.276  | 0.000           | 0.565                   | 1.641       |
| Int. [subject=ID*Run]    | Variance  | 0.0054  | 0.001 | 3.297  | 0.001           | 0.0029                  | 0.0098      |

## FMRI results

**Table S4. Brain regions that show heightened activation for mimicry > no mimicry**

| Region                           | BA | Side | Cluster size | x   | y   | z  | Z-Max |
|----------------------------------|----|------|--------------|-----|-----|----|-------|
| 1. Occipital pole                | 18 | L    | 39,834       | -6  | -92 | 14 | 5.32  |
| 1. Middle Temporal Cortex        | 37 | L    |              | -58 | -54 | 0  | 5.14  |
| 1. Supramarginal Gyrus (TPJp)    | 39 | L    |              | -54 | -44 | 36 | 5.13  |
| 1. Lateral Occipital Cortex      | 19 | L    |              | -38 | -74 | 26 | 5.13  |
| 1. Occipital pole                | 18 | L    |              | -10 | -90 | 16 | 5.09  |
| 1. Lingual Gyrus                 | 18 | L    |              | -8  | -76 | -6 | 5.08  |
| 2. Angular Gyrus (TPJp)          | 39 | R    | 1,184        | 54  | -48 | 32 | 5.07  |
| 2. Middle Temporal Gyrus         | 22 | R    |              | 64  | -26 | -4 | 4.86  |
| 2. Angular Gyrus (TPJp)          | 39 | R    |              | 50  | -48 | 28 | 4.81  |
| 2. Angular Gyrus (TPJp)          | 39 | R    |              | 56  | -48 | 26 | 4.75  |
| 2. Parietal Operculum (TPJa)     | 22 | R    |              | 52  | -34 | 20 | 4.74  |
| 2. Superior Temporal Gyrus (STS) | 22 | R    |              | 48  | -30 | -2 | 4.67  |

\*The activation survives whole-brain correction ( $P < 0.05$ ) for multiple comparisons at the cluster level 2.3. (N = 34). Locations coordinates are in stereotactic MNI space with 2x2x2 voxel size. The source of anatomical labels: FSL Atlas tools. Subpeaks of the clusters= Z-score; R= right; L = left; BA = Brodmann area. TPJp = TPJ posterior.

**Table S5. Brain regions that show heightened activation for mimicry with constricting pupils**

| Region                          | BA | Side | Cluster Size | x   | y   | z   | Z-   |
|---------------------------------|----|------|--------------|-----|-----|-----|------|
| 1. Lateral Occipital Gyrus – V5 | 19 | L    | 13,971       | -36 | -82 | -10 | 6.46 |
| 1. Precentral Gyrus             | 4  | L    |              | -34 | -18 | 56  | 5.74 |
| 1. Lateral Occipital Sulcus–V5  | 19 | L    |              | -38 | -78 | -10 | 5.62 |
| 1. Lateral Occipital Gyrus-V5   | 19 | L    |              | -42 | -80 | -4  | 5.59 |
| 2. Lateral Occipital Gyrus-V5   | 19 | R    | 7,948        | 36  | -84 | -2  | 6.4  |
| 2. Lateral Occipital gyrus      | 19 | R    |              | 36  | -66 | 62  | 6.4  |
| 2. Fusiform Gyrus               | 20 | R    |              | 40  | -38 | -22 | 5.69 |
| 3. Precentral Gyrus             | 44 | R    | 3,020        | 44  | 8   | 30  | 5.76 |

|                          |    |   |     |     |    |    |      |
|--------------------------|----|---|-----|-----|----|----|------|
| 3. a. Insula             | 47 | R |     | 32  | 28 | 0  | 5.76 |
| 3. Precentral Gyrus      | 44 | R |     | 44  | 10 | 30 | 5.57 |
| 3. Middle Frontal Sulcus | 6  | R |     | 32  | -2 | 50 | 4.62 |
| 4. Insula                | 48 | L | 768 | -36 | 18 | 2  | 5.71 |
| 4. a. Insula             | 47 | L |     | -32 | 26 | -2 | 5.12 |

\*The activation survives whole-brain correction ( $P < 0.05$ ) for multiple comparisons at the cluster level 2.3. ( $n = 34$ ). Locations coordinates are in stereotactic MNI space with 2x2x2 voxel size. The source of anatomical labels: FSL Atlas tools. Subpeaks of the clusters= Z-score; R= right; L = left; BA = Brodmann area; a = anterior.

**Table S6. Brain regions that show heightened activation for mimicry with dilating pupils**

| Region                        | BA | Side | Cluster Size | x   | y   | z   | Z-Max |
|-------------------------------|----|------|--------------|-----|-----|-----|-------|
| 1. Occipital temporal Gyrus   | 37 | R    | 763          | 50  | -62 | -14 | 6.46  |
| 1. Lateral Occipital Gyrus-V5 | 19 | R    |              | 46  | -76 | -2  | 5.74  |
| 1. Lateral Occipital Gyrus-V5 | 19 | R    |              | 44  | -82 | -14 | 5.62  |
| 1. Precentral Gyrus           | 3  | L    |              | -36 | -18 | 62  | 5.59  |
| 1. Paracingulate Gyrus        | 32 | R    |              | 8   | 26  | 36  | 6.4   |

\*The activation survives whole-brain correction ( $P < 0.05$ ) for multiple comparisons at the cluster level 2.3. ( $n = 34$ ). Locations coordinates are in stereotactic MNI space with 2x2x2 voxel size. The source of anatomical labels: FSL Atlas tools. Subpeaks of the clusters= Z-score; R= right; L = left; BA = Brodmann area.

**Table S7. ToM and Threat masks' links for download**

| Network | Studies | Date of    | Link to download                                                                                                    |
|---------|---------|------------|---------------------------------------------------------------------------------------------------------------------|
| ToM     | 140     | 10/03/2015 | <a href="http://neurosynth.org/analyses/terms/theory%20mind">http://neurosynth.org/analyses/terms/theory%20mind</a> |
| Threat  | 170     | 15/03/2015 | <a href="http://neurosynth.org/analyses/terms/threat/">http://neurosynth.org/analyses/terms/threat/</a>             |

**Table S8. Partners' pupils constricting > static**

| Region                           | BA | Side | Cluster Size | x  | y   | z   | Z-Max |
|----------------------------------|----|------|--------------|----|-----|-----|-------|
| 1. Lateral Occipital Gyrus -V5   | 37 | R    | 868          | 50 | -62 | 2   | 4.56  |
| 1. Lateral Occipital Gyrus -V5   | 37 | R    |              | 52 | -70 | 0   | 4.12  |
| 1. Lateral Occipital Gyrus -V5   | 37 | R    |              | 58 | -70 | 0   | 4.1   |
| 1. Inferior Temporal Gyrus (ITG) | 37 | R    |              | 48 | -46 | -18 | 3.65  |
| 1. Middle Temporal Gyrus         | 37 | R    |              | 52 | -44 | -6  | 3.26  |
| 1. Middle Temporal Gyrus         | 37 | R    |              | 46 | -60 | 14  | 3.17  |

\*The activation survives whole-brain correction ( $P < 0.05$ ) for multiple comparisons at the cluster level 2.3. ( $n=34$ ). Locations coordinates are in stereotactic MNI space with 2x2x2 voxel size. The source of anatomical labels: FSL Atlas tools. Subpeaks of the clusters= Z-score; R= right; L = left; BA = Brodmann area.

**Table S9. Partners' pupils dilating > static**

| Region                                          | BA | Side | Cluster Size | x   | y   | z   | Z-Max |
|-------------------------------------------------|----|------|--------------|-----|-----|-----|-------|
| 1. Lateral Occipital Gyrus –V5                  | 37 | R    | 1,152        | 50  | -62 | 2   | 2     |
| 1. Lateral Occipital Gyrus –V5                  | 37 | R    |              | 52  | -70 | 0   | -16   |
| 1. Lateral Occipital Gyrus –V5                  | 37 | R    |              | 58  | -70 | 0   | 8     |
| 1. Lateral Occipital Gyrus –V5                  | 37 | R    |              | 48  | -46 | -18 | 12    |
| 1. Lateral Occipital Gyrus –V5                  | 37 | R    |              | 52  | -44 | -6  | 2     |
| 2. Temporal Occipital Gyrus<br>(Fusiform Gyrus) | 37 | L    | 556          | 42  | -50 | -14 | -14   |
| 2. Lateral Occipital Sulcus                     | 19 | L    |              | -40 | -68 | 8   | 3.68  |
| 2. Lateral Occipital Gyrus –V5                  | 19 | L    |              | -40 | -70 | -6  | 3.16  |
| 2. Lateral Occipital Gyrus –V5                  | 19 | L    |              | -42 | -58 | 8   | 3.15  |
| 2. Lateral Occipital Gyrus –V5                  | 19 | L    |              | -52 | -66 | 12  | 2.89  |
| 2. Lateral Occipital Gyrus –V5                  | 37 | L    |              | -44 | -62 | -10 | 2.88  |

\*The activation survives whole-brain correction ( $P < 0.05$ ) for multiple comparisons at the cluster level 2.3. ( $n = 34$ ). Locations coordinates are in stereotactic MNI space with 2x2x2 voxel size. The source of anatomical labels: FSL Atlas tools. Subpeaks of the clusters= Z-score; R= right; L = left; BA = Brodmann area.

**Table S10. Partners' pupil size changing > static**

| Region                                 | BA | Side | Cluster Size | x  | y   | z   | Z-Max |
|----------------------------------------|----|------|--------------|----|-----|-----|-------|
| 1. Lateral Occipital Gyrus –V5         | 37 | R    | 1,419        | 50 | -62 | 2   | 4.75  |
| 1. Inferior Temporal Gyrus (ITG)       | 37 | R    |              | 48 | -46 | -18 | 4.22  |
| 1. Lateral Occipital Cortex            | 37 | R    |              | 60 | -70 | 0   | 3.99  |
| 1. Lateral Occipital Gyrus –V5         | 39 | R    |              | 46 | -60 | 14  | 3.63  |
| 1. Temporal Occipital (Fusiform Gyrus) | 37 | R    |              | 42 | -50 | -14 | 3.54  |
| 1. Middle Temporal Gyrus               | 37 | R    |              | 52 | -44 | -6  | 3.36  |

\*The activation survives whole-brain correction ( $P < 0.05$ ) for multiple comparisons at the cluster level 2.3. ( $n = 34$ ). Locations coordinates are in stereotactic MNI space with 2x2x2 voxel size. The source of anatomical labels: FSL Atlas tools. Subpeaks of the clusters= Z-score; R= right; L = left; BA = Brodmann area.

## Methods

**Table S11: The subjects' sex, age and questionnaire scores**

| Participant characteristics | N  | Min | Max | Mean  | Std.  |
|-----------------------------|----|-----|-----|-------|-------|
| BDI                         | 36 | 0   | 18  | 4.080 | 3.988 |
| State                       | 27 | 36  | 57  | 46.30 | 4.445 |
| Trait                       | 35 | 43  | 56  | 48.66 | 3.412 |
| EC                          | 40 | 0   | 7   | 4.686 | 1.275 |

|            |    |   |   |       |       |
|------------|----|---|---|-------|-------|
| PT         | 40 | 0 | 7 | 4.814 | 1.203 |
| LSAS Fear  | 40 | 0 | 1 | 0.519 | 0.334 |
| LSAS Avoid | 40 | 0 | 1 | 0.486 | 0.308 |

**Characteristics of subjects.** The average score of the BDI questionnaire was 4.08 which means that our participants had some minimal depression symptoms (Beck, Guth, Steer, & Ball, 1997). The average STAI score was 46.30 and 48.66 while the cut-off score for anxiety is 54-55 (Kvaal, Ulstein, Nordhus, & Engedal, 2005), therefore, we can conclude that the group is not anxious. For the Interpersonal Reactivity Index (IRI), the average score per question is among 3.5 (the half of the seven subscales). This group has an average of 4.68 per empathic concern (EC) and 4.81 for perspective taking (PT), suggesting that participants were empathetic towards other people. The average score for the LSAS is 0.5, concluding that the group does not have any abnormal fear or avoidance behaviors. BDI = Beck Depression Inventory, State & Trait = two subscales of State-Trait Anxiety Inventory, LSAS = Liebowitz Social Anxiety Scale.

**Table S12. Localizers**

| TOM-Localizer                                                                                                                                          |                                                                                                                                                       | Threat-Localizer                                                                                                                                                                                       |                                                                                                                                                                                                                     |
|--------------------------------------------------------------------------------------------------------------------------------------------------------|-------------------------------------------------------------------------------------------------------------------------------------------------------|--------------------------------------------------------------------------------------------------------------------------------------------------------------------------------------------------------|---------------------------------------------------------------------------------------------------------------------------------------------------------------------------------------------------------------------|
| 1. ToM story                                                                                                                                           | 1. Photography story                                                                                                                                  | 1. Threatening story                                                                                                                                                                                   | 1. Non-threatening story                                                                                                                                                                                            |
| Larry chose a debated topic for his class paper due on Friday. The news on Thursday indicated that the debate had been solved but Larry never read it. | A large oak tree stood in front of City Hall from the time the building was built. Last year the tree fell down and was replaced by a stone fountain. | Imagine the following situation: At night on the way home, you decide to take a shortcut through the dark park. From the middle of the park, a man with a knife approaches you. You run for your life. | Imagine the following situation: You are watching an animal documentary on TV. The doorbell rings. Your neighbour is at the door and asks whether you have some sugar for her. You go to kitchen to get it for her. |
| <b>2. Question</b><br>When Larry writes his paper he thinks the debate has been solved.                                                                | <b>2. Question</b><br>An antique drawing of City Hall shows a fountain in front.                                                                      | <b>2. Question</b><br>The situation is threatening                                                                                                                                                     | <b>2. Question</b><br>The situation is threatening                                                                                                                                                                  |
| <b>3. Answer</b><br>True/False                                                                                                                         | <b>3. Answer</b><br>True/False                                                                                                                        | <b>3. Answer</b><br>True/False                                                                                                                                                                         | <b>3. Answer</b><br>True/False                                                                                                                                                                                      |

**Localizer tasks.** Two localizer tasks were performed to map ToM and threat-related networks. The inclusion masks derived from the localizers consisted thus of voxels that showed a significant difference between conditions where participants had to use ToM or had to think about a threatening event as compared to a control condition. Scan settings were the same as for the trust-game task (**Methods, fMRI data acquisition**). The threat and ToM localizers were matched in terms of the number of words they contained. Both localizers lasted 8 minutes and their order was counter-balanced across participants.

**Partner's pupil changing > static**

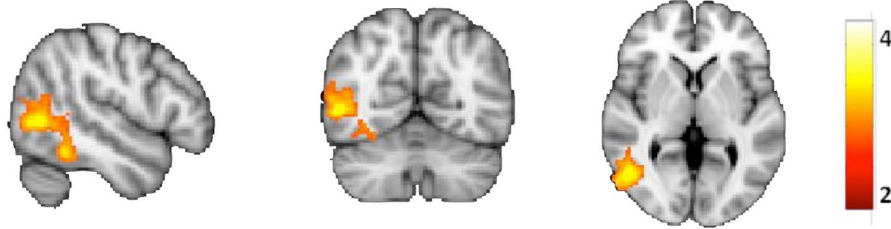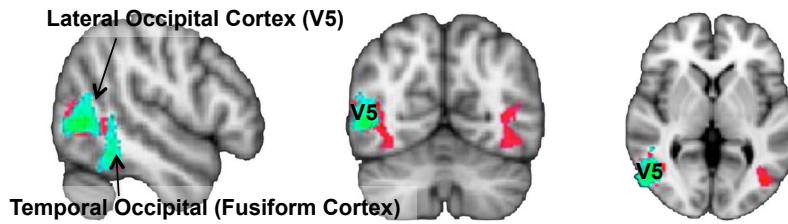

Partner's pupils dilate > static (pink)  
Partner's pupils constrict > static (green)

**Figure S1. Neural correlates of partners' pupil change** To determine the effect of observed pupillary changes on neural activity, irrespective of whether subjects mimicked or not, we evaluated the fMRI data acquired during the encoding of partner pupils: constricting, static and dilating conditions. We created the following contrasts: constrict versus static, dilate versus static, and changing versus static (combination of partner dilating and constricting conditions). This analysis revealed that compared to static pupils both partner pupil dilation and constriction was associated with enhanced activity in spatially overlapping areas including the right lateral occipital gyrus [50, -62, 2] and the temporal occipital fusiform gyrus [52, -44, -6]. The contrast between dilating versus constricting pupils did not yield significant differences. This analysis depicts that the processing of partner's dilating and constricting pupil sizes share common neural underpinnings in the lateral occipital and temporal areas. Top figure: The whole-brain analysis contrast compares partner's changing (dilating and constricting) versus static pupils (thresholded at  $P < 0.05$  (cluster-level FWE correction with multiple comparisons at 2.3. ( $n = 34$ ))). For visualization purposes, the threshold was set at  $z = 2 - 4$ . Bottom figure: shows the overlap between partner's dilating and partner's constricting pupils.
